# Supplementary material for: Salivary Volatile Organic Compound Analysis: An Optimised Methodology and Longitudinal Assessment Using Direct Injection Mass Spectrometry
Source: MDPI journal article supplement (doi:10.3390/app13074084), 2023-03-23
Supplement: s1 [file s1]

**Supplementary File S1:** Background concentrations (ppbv) of selected VOC originating from saliva collection equipment.

|                                               | <b>Acetone<br/>(m/z 59)</b> | <b>Acetic acid<br/>(m/z 61)</b> | <b>Butyric acid<br/>(m/z 89)</b> | <b>Pentanoic acid<br/>(m/z 103)</b> | <b>Hexanoic acid<br/>(m/z 117)</b> |
|-----------------------------------------------|-----------------------------|---------------------------------|----------------------------------|-------------------------------------|------------------------------------|
| <b>Salivette®</b>                             |                             |                                 |                                  |                                     |                                    |
| Dry cotton roll                               | 3649 (75)                   | 184 (97)                        | 23 (84)                          | 6.6 (83)                            | 5.0 (66)                           |
| Wet cotton roll (deionised water)             | 444 (150)                   | 134 (84)                        | 11 (94)                          | 3.7 (67)                            | 1.6 (72)                           |
| Centrifuged wet cotton roll (deionised water) | 138 (107)                   | 37 (11)                         | 3.1 (39)                         | 2.0 (15)                            | 0.9 (31)                           |
| <b>Deionised water (volume)</b>               |                             |                                 |                                  |                                     |                                    |
| 500µL                                         | 15 (1.3)                    | 12 (1.5)                        | 1.4 (2.6)                        | 0.7 (2.6)                           | 0.9 (5.1)                          |
| 1000µL                                        | 15 (2.2)                    | 11 (6.0)                        | 1.3 (2.3)                        | 0.7 (3.8)                           | 1.0 (2.2)                          |
| 1500µL                                        | 14 (3.0)                    | 10 (2.7)                        | 1.2 (6.5)                        | 0.6 (3.9)                           | 0.7 (9.9)                          |

Values are median concentration, ppbv (Coefficient of Variation, %)
